# Supplementary material
Source: PubMed Central journal article supplement (PMC2743026)
Supplement: NIHMS96858-supplement-supplement_1.pdf [file NIHMS96858-supplement-supplement_1.pdf]

**On-Line Table 1***Descriptive Statistics*

| Variables                        | <i>n</i> | Mean  | <i>SD</i> | Possible<br>Range | 95% Confidence Interval |       | $\alpha$ |
|----------------------------------|----------|-------|-----------|-------------------|-------------------------|-------|----------|
|                                  |          |       |           |                   | Lower                   | Upper |          |
| <b>1</b> Membership CSES         | 53       | 23.64 | 4.71      | 7–28              | 22.37                   | 24.91 | .70      |
| <b>2</b> Private CSES            | 53       | 22.06 | 6.55      | 7–28              | 20.30                   | 23.82 | .90      |
| <b>3</b> Public CSES             | 53       | 17.53 | 4.89      | 7–28              | 16.21                   | 18.85 | .75      |
| <b>4</b> Identity CSES           | 53       | 14.64 | 6.40      | 7–28              | 12.92                   | 16.36 | .74      |
| <b>5</b> TR Gender-Related Fears | 53       | 6.32  | 4.54      | 0–15              | 5.10                    | 7.54  | .82      |
| <b>6</b> TR Psychosocial Impact  | 53       | 4.92  | 3.05      | 0–12              | 4.10                    | 5.74  | .70      |
| <b>7</b> Somatization            | 50       | 2.50  | 3.25      | 0–24              | 1.6                     | 3.4   | .74      |
| <b>8</b> Depression              | 50       | 4.20  | 4.39      | 0–24              | 2.98                    | 5.42  | .84      |
| <b>9</b> Anxiety                 | 50       | 3.68  | 4.41      | 0–24              | 2.46                    | 4.90  | .85      |
| <b>10</b> Global Severity Index  | 50       | 10.38 | 9.40      | 0–72              | 7.77                    | 12.99 | .87      |

*Note:* CSES = Collective Self-Esteem; TR = transsexual.

**On-Line Table 2***Mean BSI-18 T-Scores Based on Male, Female, and Combined Community Norms*

|           | Male Norms |       |       |       | Female Norms |       |       |       | Combined Norms |       |       |       |
|-----------|------------|-------|-------|-------|--------------|-------|-------|-------|----------------|-------|-------|-------|
|           | SOM        | DEP   | ANX   | GSI   | SOM          | DEP   | ANX   | GSI   | SOM            | DEP   | ANX   | GSI   |
| Mean      | 50.98      | 54.74 | 52.28 | 54.38 | 50.54        | 52.98 | 50.82 | 52.24 | 50.88          | 54.58 | 51.52 | 53.66 |
| <i>SD</i> | 9.28       | 10.04 | 10.17 | 8.53  | 9.61         | 9.29  | 9.88  | 9.10  | 9.67           | 9.03  | 9.87  | 8.60  |
| ≥ 60      | 24%        | 34%   | 32%   | 28%   | 24%          | 12%   | 14%   | 18%   | 24%            | 20%   | 22%   | 22%   |

Note:  $n = 50$ ; SOM = Somatization; DEP = Depression; ANX = Anxiety; GSI = Global Severity Index; Based on the normative sample described by Derogatis (2000).

**On-Line Table 3***Zero Order Correlations with 95% Confidence Intervals*

| <b>Variables</b>                 | <b>1</b> | <b>2</b>   | <b>3</b>   | <b>4</b>   | <b>5</b>    | <b>6</b>     | <b>7</b>     | <b>8</b>     |
|----------------------------------|----------|------------|------------|------------|-------------|--------------|--------------|--------------|
| <b>1</b> Membership CSES         | —        | (.33, .72) | (.08, .56) | (.25, .66) | (-.34, .21) | (-.51, -.01) | (-.56, -.06) | (-.57, -.07) |
| <b>2</b> Private CSES            | .55***   | —          | (.29, .69) | (.33, .72) | (-.43, .11) | (-.56, -.07) | (-.44, .10)  | (-.65, -.20) |
| <b>3</b> Public CSES             | .34*     | .51***     | —          | (.07, .56) | (-.47, .04) | (-.37, .18)  | (-.31, .26)  | (-.55, -.03) |
| <b>4</b> Identity CSES           | .48***   | .55***     | .33*       | —          | (-.37, .18) | (-.34, .21)  | (-.40, .16)  | (-.47, .06)  |
| <b>5</b> TR Gender-Related Fears | -.07     | -.17       | -.23*      | -.10       | —           | (.31, .71)   | (.10, .59)   | (.10, .59)   |
| <b>6</b> TR Psychosocial Impact  | -.28*    | -.33*      | -.10       | -.07       | .53***      | —            | (.14, .62)   | (.17, .64)   |
| <b>7</b> Somatization            | -.33*    | -.18       | -.03       | -.13       | .37**       | .40**        | —            | (-.13, .42)  |
| <b>8</b> Depression              | -.34*    | -.45**     | -.31*      | -.22       | .37**       | .43**        | .15          | —            |
| <b>9</b> Anxiety                 | -.29*    | -.30*      | -.28       | -.15       | .41**       | .32*         | .35*         | .56***       |
| <b>10</b> Global Severity Index  | -.41**   | -.45**     | -.30*      | -.23       | .50***      | .53***       | .62***       | .79***       |

*Note:* CSES = Collective Self-Esteem Scale ; TR = transsexual; 95% confidence intervals are above the diagonal in parenthesis.

\*  $p < .05$ ; \*\*  $p < .01$ ; \*\*\*  $p < .001$

**On-Line Table 3 (cont'd)**

| Variables                        | 9            | 10           |
|----------------------------------|--------------|--------------|
| <b>1</b> Membership CSES         | (-.53, -.01) | (-.62, -.15) |
| <b>2</b> Private CSES            | (-.54, -.02) | (-.65, -.20) |
| <b>3</b> Public CSES             | (-.52, .00)  | (-.54, -.02) |
| <b>4</b> Identity CSES           | (-.42, .13)  | (-.48, .05)  |
| <b>5</b> TR Gender-Related Fears | (.15, .62)   | (.26, .69)   |
| <b>6</b> TR Psychosocial Impact  | (.05, .56)   | (.29, .71)   |
| <b>7</b> Somatization            | (.08, .58)   | (.42, .77)   |
| <b>8</b> Depression              | (.34, .73)   | (.67, .88)   |
| <b>9</b> Anxiety                 | —            | (.69, .89)   |
| <b>10</b> Global Severity Index  | .81***       | —            |
